# Supplementary material for: Brain imaging data and summary data-based Mendelian randomization analysis reveal the impact of multiorgan aging on schizophrenia
Source: Front Psychiatry. 2026 Feb 2;16:1730143. doi: 10.3389/fpsyt.2025.1730143 (PMC12907309; doi:10.3389/fpsyt.2025.1730143)
Supplement: Supplementary file 2 [file Table1.xlsx]

## Sheet: Sheet 1
Group	ONTOLOGY	ID	Description	GeneRatio	BgRatio	pvalue	p.adjust	qvalue	geneID	Count
Lung	BP	GO:0016139	glycoside catabolic process	1/10	10/18800	0.0053077	0.0849202	0.0471108	NAGA	1
Lung	BP	GO:0033044	regulation of chromosome organization	2/10	212/18800	0.00536597	0.0849202	0.0471108	INO80E/XRCC3	2
Lung	BP	GO:0090657	telomeric loop disassembly	1/10	11/18800	0.00583708	0.0849202	0.0471108	XRCC3	1
Lung	BP	GO:1901978	positive regulation of cell cycle checkpoint	1/10	11/18800	0.00583708	0.0849202	0.0471108	XRCC3	1
Lung	BP	GO:0046479	glycosphingolipid catabolic process	1/10	14/18800	0.00742367	0.0849202	0.0471108	NAGA	1
Lung	BP	GO:0000722	telomere maintenance via recombination	1/10	15/18800	0.00795203	0.0849202	0.0471108	XRCC3	1
Lung	BP	GO:0001325	formation of extrachromosomal circular DNA	1/10	15/18800	0.00795203	0.0849202	0.0471108	XRCC3	1
Lung	BP	GO:0090656	t-circle formation	1/10	15/18800	0.00795203	0.0849202	0.0471108	XRCC3	1
Lung	BP	GO:0090737	telomere maintenance via telomere trimming	1/10	15/18800	0.00795203	0.0849202	0.0471108	XRCC3	1
Lung	BP	GO:0019377	glycolipid catabolic process	1/10	16/18800	0.00848014	0.0849202	0.0471108	NAGA	1
Lung	BP	GO:0006677	glycosylceramide metabolic process	1/10	17/18800	0.00900799	0.0849202	0.0471108	NAGA	1
Lung	BP	GO:0060382	regulation of DNA strand elongation	1/10	17/18800	0.00900799	0.0849202	0.0471108	INO80E	1
Lung	BP	GO:0090231	regulation of spindle checkpoint	1/10	17/18800	0.00900799	0.0849202	0.0471108	XRCC3	1
Lung	BP	GO:0090266	regulation of mitotic cell cycle spindle assembly checkpoint	1/10	17/18800	0.00900799	0.0849202	0.0471108	XRCC3	1
Lung	BP	GO:1903504	regulation of mitotic spindle checkpoint	1/10	17/18800	0.00900799	0.0849202	0.0471108	XRCC3	1
Lung	BP	GO:0046514	ceramide catabolic process	1/10	21/18800	0.0111169	0.0849202	0.0471108	NAGA	1
Lung	BP	GO:0016137	glycoside metabolic process	1/10	22/18800	0.0116435	0.0849202	0.0471108	NAGA	1
Lung	BP	GO:0006310	DNA recombination	2/10	324/18800	0.0121608	0.0849202	0.0471108	INO80E/XRCC3	2
Lung	BP	GO:0031579	membrane raft organization	1/10	25/18800	0.0132217	0.0849202	0.0471108	YJEFN3	1
Lung	BP	GO:0006312	mitotic recombination	1/10	26/18800	0.0137473	0.0849202	0.0471108	XRCC3	1
Lung	BP	GO:0071425	hematopoietic stem cell proliferation	1/10	27/18800	0.0142726	0.0849202	0.0471108	YJEFN3	1
Lung	BP	GO:0007202	activation of phospholipase C activity	1/10	30/18800	0.0158471	0.0849202	0.0471108	LPAR2	1
Lung	BP	GO:0030149	sphingolipid catabolic process	1/10	31/18800	0.0163714	0.0849202	0.0471108	NAGA	1
Lung	BP	GO:0036297	interstrand cross-link repair	1/10	32/18800	0.0168955	0.0849202	0.0471108	XRCC3	1
Lung	BP	GO:1901976	regulation of cell cycle checkpoint	1/10	34/18800	0.0179429	0.0849202	0.0471108	XRCC3	1
Lung	BP	GO:1901658	glycosyl compound catabolic process	1/10	35/18800	0.0184662	0.0849202	0.0471108	NAGA	1
Lung	BP	GO:0046466	membrane lipid catabolic process	1/10	36/18800	0.0189893	0.0849202	0.0471108	NAGA	1
Lung	BP	GO:0022616	DNA strand elongation	1/10	37/18800	0.0195121	0.0849202	0.0471108	INO80E	1
Lung	BP	GO:0007094	mitotic spindle assembly checkpoint signaling	1/10	38/18800	0.0200347	0.0849202	0.0471108	XRCC3	1
Lung	BP	GO:0071173	spindle assembly checkpoint signaling	1/10	38/18800	0.0200347	0.0849202	0.0471108	XRCC3	1
Lung	BP	GO:0071174	mitotic spindle checkpoint signaling	1/10	38/18800	0.0200347	0.0849202	0.0471108	XRCC3	1
Lung	BP	GO:0031577	spindle checkpoint signaling	1/10	39/18800	0.020557	0.0849202	0.0471108	XRCC3	1
Lung	BP	GO:0010863	positive regulation of phospholipase C activity	1/10	40/18800	0.021079	0.0849202	0.0471108	LPAR2	1
Lung	BP	GO:0045841	negative regulation of mitotic metaphase/anaphase transition	1/10	40/18800	0.021079	0.0849202	0.0471108	XRCC3	1
Lung	BP	GO:1900274	regulation of phospholipase C activity	1/10	42/18800	0.0221224	0.0849202	0.0471108	LPAR2	1
Lung	BP	GO:1902100	negative regulation of metaphase/anaphase transition of cell cycle	1/10	42/18800	0.0221224	0.0849202	0.0471108	XRCC3	1
Lung	BP	GO:0033046	negative regulation of sister chromatid segregation	1/10	43/18800	0.0226437	0.0849202	0.0471108	XRCC3	1
Lung	BP	GO:0033048	negative regulation of mitotic sister chromatid segregation	1/10	43/18800	0.0226437	0.0849202	0.0471108	XRCC3	1
Lung	BP	GO:2000816	negative regulation of mitotic sister chromatid separation	1/10	43/18800	0.0226437	0.0849202	0.0471108	XRCC3	1
Lung	BP	GO:0051985	negative regulation of chromosome segregation	1/10	45/18800	0.0236856	0.0849202	0.0471108	XRCC3	1
Lung	BP	GO:1905819	negative regulation of chromosome separation	1/10	45/18800	0.0236856	0.0849202	0.0471108	XRCC3	1
Lung	BP	GO:0033047	regulation of mitotic sister chromatid segregation	1/10	46/18800	0.0242062	0.0849202	0.0471108	XRCC3	1
Lung	BP	GO:0010824	regulation of centrosome duplication	1/10	47/18800	0.0247265	0.0849202	0.0471108	XRCC3	1
Lung	BP	GO:0045839	negative regulation of mitotic nuclear division	1/10	48/18800	0.0252465	0.0849202	0.0471108	XRCC3	1
Lung	BP	GO:0010874	regulation of cholesterol efflux	1/10	52/18800	0.0273243	0.087612	0.0486041	YJEFN3	1
Lung	BP	GO:0046605	regulation of centrosome cycle	1/10	52/18800	0.0273243	0.087612	0.0486041	XRCC3	1
Lung	BP	GO:0010518	positive regulation of phospholipase activity	1/10	55/18800	0.02888	0.087612	0.0486041	LPAR2	1
Lung	BP	GO:0051784	negative regulation of nuclear division	1/10	55/18800	0.02888	0.087612	0.0486041	XRCC3	1
Lung	BP	GO:0031122	cytoplasmic microtubule organization	1/10	57/18800	0.0299159	0.087612	0.0486041	WDR73	1
Lung	BP	GO:0006687	glycosphingolipid metabolic process	1/10	60/18800	0.0314678	0.087612	0.0486041	NAGA	1
Lung	BP	GO:0030071	regulation of mitotic metaphase/anaphase transition	1/10	60/18800	0.0314678	0.087612	0.0486041	XRCC3	1
Lung	BP	GO:0007091	metaphase/anaphase transition of mitotic cell cycle	1/10	62/18800	0.0325012	0.087612	0.0486041	XRCC3	1
Lung	BP	GO:0009311	oligosaccharide metabolic process	1/10	63/18800	0.0330176	0.087612	0.0486041	NAGA	1
Lung	BP	GO:1902099	regulation of metaphase/anaphase transition of cell cycle	1/10	63/18800	0.0330176	0.087612	0.0486041	XRCC3	1
Lung	BP	GO:0010965	regulation of mitotic sister chromatid separation	1/10	65/18800	0.0340495	0.087612	0.0486041	XRCC3	1
Lung	BP	GO:0035914	skeletal muscle cell differentiation	1/10	65/18800	0.0340495	0.087612	0.0486041	FOXN2	1
Lung	BP	GO:0044784	metaphase/anaphase transition of cell cycle	1/10	65/18800	0.0340495	0.087612	0.0486041	XRCC3	1
Lung	BP	GO:0010517	regulation of phospholipase activity	1/10	66/18800	0.0345651	0.087612	0.0486041	LPAR2	1
Lung	BP	GO:0051306	mitotic sister chromatid separation	1/10	68/18800	0.0355955	0.087612	0.0486041	XRCC3	1
Lung	BP	GO:0060193	positive regulation of lipase activity	1/10	68/18800	0.0355955	0.087612	0.0486041	LPAR2	1
Lung	BP	GO:0033344	cholesterol efflux	1/10	69/18800	0.0361104	0.087612	0.0486041	YJEFN3	1
Lung	BP	GO:0033045	regulation of sister chromatid segregation	1/10	72/18800	0.0376534	0.0884556	0.0490721	XRCC3	1
Lung	BP	GO:1905818	regulation of chromosome separation	1/10	72/18800	0.0376534	0.0884556	0.0490721	XRCC3	1
Lung	BP	GO:0051298	centrosome duplication	1/10	74/18800	0.0386809	0.0890407	0.0493967	XRCC3	1
Lung	BP	GO:0030968	endoplasmic reticulum unfolded protein response	1/10	76/18800	0.0397073	0.0890407	0.0493967	CREB3L4	1
Lung	BP	GO:0072089	stem cell proliferation	1/10	76/18800	0.0397073	0.0890407	0.0493967	YJEFN3	1
Lung	CC	GO:0032280	symmetric synapse	1/11	10/19594	0.00560109	0.0964956	0.0618278	IGSF9B	1
Lung	CC	GO:0031011	Ino80 complex	1/11	15/19594	0.00839092	0.0964956	0.0618278	INO80E	1
Lung	MF	GO:0015929	hexosaminidase activity	1/11	15/18410	0.00892851	0.0337116	0.0195173	NAGA	1
Lung	MF	GO:0016894	endonuclease activity, active with either ribo- or deoxyribonucleic acids and producing 3'-phosphomonoesters	1/11	15/18410	0.00892851	0.0337116	0.0195173	XRCC3	1
Lung	MF	GO:0045125	bioactive lipid receptor activity	1/11	16/18410	0.00952116	0.0337116	0.0195173	LPAR2	1
Lung	MF	GO:0000400	four-way junction DNA binding	1/11	17/18410	0.0101135	0.0337116	0.0195173	XRCC3	1
Lung	MF	GO:0016854	racemase and epimerase activity	1/11	17/18410	0.0101135	0.0337116	0.0195173	YJEFN3	1
Lung	MF	GO:0035497	cAMP response element binding	1/11	17/18410	0.0101135	0.0337116	0.0195173	CREB3L4	1
Lung	MF	GO:0000217	DNA secondary structure binding	1/11	36/18410	0.0213067	0.0547315	0.0316867	XRCC3	1
Lung	MF	GO:0004520	endodeoxyribonuclease activity	1/11	37/18410	0.0218926	0.0547315	0.0316867	XRCC3	1
Lung	MF	GO:0004536	deoxyribonuclease activity	1/11	57/18410	0.0335442	0.0745426	0.0431563	XRCC3	1
Pancreas	CC	GO:0070603	SWI/SNF superfamily-type complex	2/15	86/19594	0.00192643	0.0362849	0.0265241	INO80E/SF3B1	2
Pancreas	CC	GO:1904949	ATPase complex	2/15	88/19594	0.00201583	0.0362849	0.0265241	INO80E/SF3B1	2
Pancreas	CC	GO:0031011	Ino80 complex	1/15	15/19594	0.0114258	0.0776402	0.0567546	INO80E	1
Pancreas	CC	GO:0005869	dynactin complex	1/15	16/19594	0.0121832	0.0776402	0.0567546	ACTR1B	1
Pancreas	CC	GO:0071004	U2-type prespliceosome	1/15	17/19594	0.01294	0.0776402	0.0567546	SF3B1	1
Pancreas	CC	GO:0071010	prespliceosome	1/15	17/19594	0.01294	0.0776402	0.0567546	SF3B1	1
Pancreas	CC	GO:0005686	U2 snRNP	1/15	25/19594	0.0189752	0.0879196	0.0642687	SF3B1	1
Pancreas	CC	GO:0097346	INO80-type complex	1/15	26/19594	0.0197272	0.0879196	0.0642687	INO80E	1
Pancreas	CC	GO:0005689	U12-type spliceosomal complex	1/15	29/19594	0.0219799	0.0879196	0.0642687	SF3B1	1
Pancreas	MF	GO:0035374	chondroitin sulfate binding	1/14	10/18410	0.00758044	0.07137	0.0492207	MDK	1
Pancreas	MF	GO:0000774	adenyl-nucleotide exchange factor activity	1/14	11/18410	0.00833554	0.07137	0.0492207	BAG5	1
Pancreas	MF	GO:0008417	fucosyltransferase activity	1/14	13/18410	0.00984414	0.07137	0.0492207	FUT2	1
Pancreas	MF	GO:0060590	ATPase regulator activity	1/14	13/18410	0.00984414	0.07137	0.0492207	BAG5	1
Pancreas	MF	GO:0005112	Notch binding	1/14	25/18410	0.0188511	0.0935519	0.0645186	NOTCH4	1
Pancreas	MF	GO:0004806	triglyceride lipase activity	1/14	26/18410	0.0195982	0.0935519	0.0645186	DDHD2	1
Pancreas	MF	GO:0005184	neuropeptide hormone activity	1/14	30/18410	0.0225815	0.0935519	0.0645186	NMB	1
Pancreas	MF	GO:0071855	neuropeptide receptor binding	1/14	36/18410	0.0270406	0.0980221	0.0676015	NMB	1
Pancreas	KEGG	hsa03040	Spliceosome	2/6	147/8164	0.00460634	0.0644887	0.0484877	PUF60/SF3B1	2
Pancreas	KEGG	hsa00603	Glycosphingolipid biosynthesis - globo and isoglobo series	1/6	15/8164	0.0109768	0.0768379	0.0577728	FUT2	1
Pancreas	KEGG	hsa00601	Glycosphingolipid biosynthesis - lacto and neolacto series	1/6	27/8164	0.0196859	0.0918673	0.0690732	FUT2	1
Spleen	BP	GO:0016139	glycoside catabolic process	1/6	10/18800	0.00318767	0.0584873	0.0265577	NAGA	1
Spleen	BP	GO:0071340	skeletal muscle acetylcholine-gated channel clustering	1/6	10/18800	0.00318767	0.0584873	0.0265577	LRP4	1
Spleen	BP	GO:0097105	presynaptic membrane assembly	1/6	10/18800	0.00318767	0.0584873	0.0265577	LRP4	1
Spleen	BP	GO:0090657	telomeric loop disassembly	1/6	11/18800	0.00350597	0.0584873	0.0265577	XRCC3	1
Spleen	BP	GO:0097090	presynaptic membrane organization	1/6	11/18800	0.00350597	0.0584873	0.0265577	LRP4	1
Spleen	BP	GO:0097104	postsynaptic membrane assembly	1/6	11/18800	0.00350597	0.0584873	0.0265577	LRP4	1
Spleen	BP	GO:1901978	positive regulation of cell cycle checkpoint	1/6	11/18800	0.00350597	0.0584873	0.0265577	XRCC3	1
Spleen	BP	GO:0071712	ER-associated misfolded protein catabolic process	1/6	12/18800	0.00382419	0.0584873	0.0265577	RNF5	1
Spleen	BP	GO:1903909	regulation of receptor clustering	1/6	12/18800	0.00382419	0.0584873	0.0265577	LRP4	1
Spleen	BP	GO:0046479	glycosphingolipid catabolic process	1/6	14/18800	0.00446037	0.0584873	0.0265577	NAGA	1
Spleen	BP	GO:0000722	telomere maintenance via recombination	1/6	15/18800	0.00477833	0.0584873	0.0265577	XRCC3	1
Spleen	BP	GO:0001325	formation of extrachromosomal circular DNA	1/6	15/18800	0.00477833	0.0584873	0.0265577	XRCC3	1
Spleen	BP	GO:0090656	t-circle formation	1/6	15/18800	0.00477833	0.0584873	0.0265577	XRCC3	1
Spleen	BP	GO:0090737	telomere maintenance via telomere trimming	1/6	15/18800	0.00477833	0.0584873	0.0265577	XRCC3	1
Spleen	BP	GO:1904380	endoplasmic reticulum mannose trimming	1/6	15/18800	0.00477833	0.0584873	0.0265577	RNF5	1
Spleen	BP	GO:0019377	glycolipid catabolic process	1/6	16/18800	0.00509621	0.0584873	0.0265577	NAGA	1
Spleen	BP	GO:0006677	glycosylceramide metabolic process	1/6	17/18800	0.005414	0.0584873	0.0265577	NAGA	1
Spleen	BP	GO:0090231	regulation of spindle checkpoint	1/6	17/18800	0.005414	0.0584873	0.0265577	XRCC3	1
Spleen	BP	GO:0090266	regulation of mitotic cell cycle spindle assembly checkpoint	1/6	17/18800	0.005414	0.0584873	0.0265577	XRCC3	1
Spleen	BP	GO:1903504	regulation of mitotic spindle checkpoint	1/6	17/18800	0.005414	0.0584873	0.0265577	XRCC3	1
Spleen	BP	GO:0036507	protein demannosylation	1/6	18/18800	0.00573171	0.0584873	0.0265577	RNF5	1
Spleen	BP	GO:0036508	protein alpha-1,2-demannosylation	1/6	18/18800	0.00573171	0.0584873	0.0265577	RNF5	1
Spleen	BP	GO:0097094	craniofacial suture morphogenesis	1/6	18/18800	0.00573171	0.0584873	0.0265577	MMP16	1
Spleen	BP	GO:0046514	ceramide catabolic process	1/6	21/18800	0.00668433	0.0584873	0.0265577	NAGA	1
Spleen	BP	GO:0016137	glycoside metabolic process	1/6	22/18800	0.0070017	0.0584873	0.0265577	NAGA	1
Spleen	BP	GO:0071218	cellular response to misfolded protein	1/6	22/18800	0.0070017	0.0584873	0.0265577	RNF5	1
Spleen	BP	GO:0001503	ossification	2/6	420/18800	0.00703703	0.0584873	0.0265577	LRP4/MMP16	2
Spleen	BP	GO:0035988	chondrocyte proliferation	1/6	23/18800	0.00731898	0.0584873	0.0265577	MMP16	1
Spleen	BP	GO:0051788	response to misfolded protein	1/6	24/18800	0.00763618	0.0584873	0.0265577	RNF5	1
Spleen	BP	GO:0006312	mitotic recombination	1/6	26/18800	0.00827033	0.0584873	0.0265577	XRCC3	1
Spleen	BP	GO:0006517	protein deglycosylation	1/6	26/18800	0.00827033	0.0584873	0.0265577	RNF5	1
Spleen	BP	GO:0006515	protein quality control for misfolded or incompletely synthesized proteins	1/6	27/18800	0.00858728	0.0584873	0.0265577	RNF5	1
Spleen	BP	GO:0001958	endochondral ossification	1/6	28/18800	0.00890414	0.0584873	0.0265577	MMP16	1
Spleen	BP	GO:0036075	replacement ossification	1/6	28/18800	0.00890414	0.0584873	0.0265577	MMP16	1
Spleen	BP	GO:0099068	postsynapse assembly	1/6	29/18800	0.00922092	0.0584873	0.0265577	LRP4	1
Spleen	BP	GO:0030149	sphingolipid catabolic process	1/6	31/18800	0.00985423	0.0584873	0.0265577	NAGA	1
Spleen	BP	GO:0050482	arachidonic acid secretion	1/6	31/18800	0.00985423	0.0584873	0.0265577	NMB	1
Spleen	BP	GO:1903963	arachidonate transport	1/6	31/18800	0.00985423	0.0584873	0.0265577	NMB	1
Spleen	BP	GO:0036297	interstrand cross-link repair	1/6	32/18800	0.0101708	0.0584873	0.0265577	XRCC3	1
Spleen	BP	GO:0009954	proximal/distal pattern formation	1/6	34/18800	0.0108036	0.0584873	0.0265577	LRP4	1
Spleen	BP	GO:1901976	regulation of cell cycle checkpoint	1/6	34/18800	0.0108036	0.0584873	0.0265577	XRCC3	1
Spleen	BP	GO:1901658	glycosyl compound catabolic process	1/6	35/18800	0.0111198	0.0584873	0.0265577	NAGA	1
Spleen	BP	GO:0001941	postsynaptic membrane organization	1/6	36/18800	0.011436	0.0584873	0.0265577	LRP4	1
Spleen	BP	GO:0046466	membrane lipid catabolic process	1/6	36/18800	0.011436	0.0584873	0.0265577	NAGA	1
Spleen	BP	GO:0030279	negative regulation of ossification	1/6	37/18800	0.0117521	0.0584873	0.0265577	LRP4	1
Spleen	BP	GO:0007094	mitotic spindle assembly checkpoint signaling	1/6	38/18800	0.0120681	0.0584873	0.0265577	XRCC3	1
Spleen	BP	GO:0071173	spindle assembly checkpoint signaling	1/6	38/18800	0.0120681	0.0584873	0.0265577	XRCC3	1
Spleen	BP	GO:0071174	mitotic spindle checkpoint signaling	1/6	38/18800	0.0120681	0.0584873	0.0265577	XRCC3	1
Spleen	BP	GO:0031577	spindle checkpoint signaling	1/6	39/18800	0.0123841	0.0584873	0.0265577	XRCC3	1
Spleen	BP	GO:0097242	amyloid-beta clearance	1/6	39/18800	0.0123841	0.0584873	0.0265577	LRP4	1
Spleen	BP	GO:0045841	negative regulation of mitotic metaphase/anaphase transition	1/6	40/18800	0.0126999	0.0584873	0.0265577	XRCC3	1
Spleen	BP	GO:0030574	collagen catabolic process	1/6	42/18800	0.0133314	0.0584873	0.0265577	MMP16	1
Spleen	BP	GO:1902100	negative regulation of metaphase/anaphase transition of cell cycle	1/6	42/18800	0.0133314	0.0584873	0.0265577	XRCC3	1
Spleen	BP	GO:0007528	neuromuscular junction development	1/6	43/18800	0.013647	0.0584873	0.0265577	LRP4	1
Spleen	BP	GO:0033046	negative regulation of sister chromatid segregation	1/6	43/18800	0.013647	0.0584873	0.0265577	XRCC3	1
Spleen	BP	GO:0033048	negative regulation of mitotic sister chromatid segregation	1/6	43/18800	0.013647	0.0584873	0.0265577	XRCC3	1
Spleen	BP	GO:2000816	negative regulation of mitotic sister chromatid separation	1/6	43/18800	0.013647	0.0584873	0.0265577	XRCC3	1
Spleen	BP	GO:0051985	negative regulation of chromosome segregation	1/6	45/18800	0.0142779	0.0584873	0.0265577	XRCC3	1
Spleen	BP	GO:1905819	negative regulation of chromosome separation	1/6	45/18800	0.0142779	0.0584873	0.0265577	XRCC3	1
Spleen	BP	GO:2000785	regulation of autophagosome assembly	1/6	45/18800	0.0142779	0.0584873	0.0265577	RNF5	1
Spleen	BP	GO:0032309	icosanoid secretion	1/6	46/18800	0.0145933	0.0584873	0.0265577	NMB	1
Spleen	BP	GO:0033047	regulation of mitotic sister chromatid segregation	1/6	46/18800	0.0145933	0.0584873	0.0265577	XRCC3	1
Spleen	BP	GO:0048701	embryonic cranial skeleton morphogenesis	1/6	46/18800	0.0145933	0.0584873	0.0265577	MMP16	1
Spleen	BP	GO:0010824	regulation of centrosome duplication	1/6	47/18800	0.0149085	0.0584873	0.0265577	XRCC3	1
Spleen	BP	GO:0031648	protein destabilization	1/6	47/18800	0.0149085	0.0584873	0.0265577	RNF5	1
Spleen	BP	GO:0045839	negative regulation of mitotic nuclear division	1/6	48/18800	0.0152237	0.0588189	0.0267083	XRCC3	1
Spleen	BP	GO:0099054	presynapse assembly	1/6	50/18800	0.0158538	0.0600473	0.0272661	LRP4	1
Spleen	BP	GO:0044088	regulation of vacuole organization	1/6	51/18800	0.0161687	0.0600473	0.0272661	RNF5	1
Spleen	BP	GO:0046605	regulation of centrosome cycle	1/6	52/18800	0.0164836	0.0600473	0.0272661	XRCC3	1
Spleen	BP	GO:0099172	presynapse organization	1/6	52/18800	0.0164836	0.0600473	0.0272661	LRP4	1
Spleen	BP	GO:0071715	icosanoid transport	1/6	54/18800	0.017113	0.0602882	0.0273754	NMB	1
Spleen	BP	GO:0051784	negative regulation of nuclear division	1/6	55/18800	0.0174276	0.0602882	0.0273754	XRCC3	1
Spleen	BP	GO:0043113	receptor clustering	1/6	56/18800	0.0177421	0.0602882	0.0273754	LRP4	1
Spleen	BP	GO:0060350	endochondral bone morphogenesis	1/6	57/18800	0.0180565	0.0602882	0.0273754	MMP16	1
Spleen	BP	GO:0070534	protein K63-linked ubiquitination	1/6	57/18800	0.0180565	0.0602882	0.0273754	RNF5	1
Spleen	BP	GO:0042733	embryonic digit morphogenesis	1/6	58/18800	0.0183709	0.0602882	0.0273754	LRP4	1
Spleen	BP	GO:0071709	membrane assembly	1/6	58/18800	0.0183709	0.0602882	0.0273754	LRP4	1
Spleen	BP	GO:0006687	glycosphingolipid metabolic process	1/6	60/18800	0.0189993	0.0602882	0.0273754	NAGA	1
Spleen	BP	GO:0030071	regulation of mitotic metaphase/anaphase transition	1/6	60/18800	0.0189993	0.0602882	0.0273754	XRCC3	1
Spleen	BP	GO:0046888	negative regulation of hormone secretion	1/6	60/18800	0.0189993	0.0602882	0.0273754	NMB	1
Spleen	BP	GO:0007091	metaphase/anaphase transition of mitotic cell cycle	1/6	62/18800	0.0196274	0.0602882	0.0273754	XRCC3	1
Spleen	BP	GO:0044091	membrane biogenesis	1/6	62/18800	0.0196274	0.0602882	0.0273754	LRP4	1
Spleen	BP	GO:0009311	oligosaccharide metabolic process	1/6	63/18800	0.0199413	0.0602882	0.0273754	NAGA	1
Spleen	BP	GO:1902099	regulation of metaphase/anaphase transition of cell cycle	1/6	63/18800	0.0199413	0.0602882	0.0273754	XRCC3	1
Spleen	BP	GO:0050771	negative regulation of axonogenesis	1/6	64/18800	0.0202552	0.0602882	0.0273754	LRP4	1
Spleen	BP	GO:0010965	regulation of mitotic sister chromatid separation	1/6	65/18800	0.0205689	0.0602882	0.0273754	XRCC3	1
Spleen	BP	GO:0044784	metaphase/anaphase transition of cell cycle	1/6	65/18800	0.0205689	0.0602882	0.0273754	XRCC3	1
Spleen	BP	GO:0015909	long-chain fatty acid transport	1/6	66/18800	0.0208826	0.060512	0.0274771	NMB	1
Spleen	BP	GO:0070936	protein K48-linked ubiquitination	1/6	67/18800	0.0211962	0.0607306	0.0275763	RNF5	1
Spleen	BP	GO:0051306	mitotic sister chromatid separation	1/6	68/18800	0.0215097	0.060944	0.0276733	XRCC3	1
Spleen	BP	GO:1904888	cranial skeletal system development	1/6	70/18800	0.0221364	0.0620306	0.0281666	MMP16	1
Spleen	BP	GO:0033045	regulation of sister chromatid segregation	1/6	72/18800	0.0227628	0.0624142	0.0283408	XRCC3	1
Spleen	BP	GO:1905818	regulation of chromosome separation	1/6	72/18800	0.0227628	0.0624142	0.0283408	XRCC3	1
Spleen	BP	GO:0051298	centrosome duplication	1/6	74/18800	0.0233889	0.0634487	0.0288105	XRCC3	1
Spleen	BP	GO:0010507	negative regulation of autophagy	1/6	85/18800	0.0268264	0.0711269	0.0322971	RNF5	1
Spleen	BP	GO:0030433	ubiquitin-dependent ERAD pathway	1/6	86/18800	0.0271384	0.0711269	0.0322971	RNF5	1
Spleen	BP	GO:0001942	hair follicle development	1/6	89/18800	0.0280739	0.0711269	0.0322971	LRP4	1
Spleen	BP	GO:2001251	negative regulation of chromosome organization	1/6	89/18800	0.0280739	0.0711269	0.0322971	XRCC3	1
Spleen	BP	GO:0042475	odontogenesis of dentin-containing tooth	1/6	90/18800	0.0283856	0.0711269	0.0322971	LRP4	1
Spleen	BP	GO:1901657	glycosyl compound metabolic process	1/6	90/18800	0.0283856	0.0711269	0.0322971	NAGA	1
Spleen	BP	GO:0051983	regulation of chromosome segregation	1/6	91/18800	0.0286971	0.0711269	0.0322971	XRCC3	1
Spleen	BP	GO:0009953	dorsal/ventral pattern formation	1/6	92/18800	0.0290086	0.0711269	0.0322971	LRP4	1
Spleen	BP	GO:0022404	molting cycle process	1/6	92/18800	0.0290086	0.0711269	0.0322971	LRP4	1
Spleen	BP	GO:0022405	hair cycle process	1/6	92/18800	0.0290086	0.0711269	0.0322971	LRP4	1
Spleen	BP	GO:0098773	skin epidermis development	1/6	93/18800	0.0293201	0.0712058	0.0323329	LRP4	1
Spleen	BP	GO:0048704	embryonic skeletal system morphogenesis	1/6	94/18800	0.0296314	0.071283	0.0323679	MMP16	1
Spleen	BP	GO:0051304	chromosome separation	1/6	97/18800	0.0305649	0.0728415	0.0330756	XRCC3	1
Spleen	BP	GO:0060349	bone morphogenesis	1/6	98/18800	0.0308759	0.0729014	0.0331028	MMP16	1
Spleen	BP	GO:0015908	fatty acid transport	1/6	99/18800	0.0311868	0.0729599	0.0331294	NMB	1
Spleen	BP	GO:0032963	collagen metabolic process	1/6	101/18800	0.0318084	0.0737376	0.0334825	MMP16	1
Spleen	BP	GO:0006664	glycolipid metabolic process	1/6	103/18800	0.0324296	0.0738353	0.0335269	NAGA	1
Spleen	BP	GO:1905477	positive regulation of protein localization to membrane	1/6	103/18800	0.0324296	0.0738353	0.0335269	LRP4	1
Spleen	BP	GO:1903509	liposaccharide metabolic process	1/6	104/18800	0.0327401	0.0738826	0.0335483	NAGA	1
Spleen	BP	GO:0006672	ceramide metabolic process	1/6	105/18800	0.0330505	0.0739288	0.0335693	NAGA	1
Spleen	BP	GO:0000045	autophagosome assembly	1/6	107/18800	0.0336711	0.0746621	0.0339023	RNF5	1
Spleen	BP	GO:0007218	neuropeptide signaling pathway	1/6	108/18800	0.0339813	0.0747003	0.0339196	NMB	1
Spleen	BP	GO:0036503	ERAD pathway	1/6	109/18800	0.0342914	0.0747376	0.0339366	RNF5	1
Spleen	BP	GO:0007088	regulation of mitotic nuclear division	1/6	111/18800	0.0349113	0.0748099	0.0339694	XRCC3	1
Spleen	BP	GO:1905037	autophagosome organization	1/6	111/18800	0.0349113	0.0748099	0.0339694	RNF5	1
Spleen	BP	GO:0042303	molting cycle	1/6	114/18800	0.0358406	0.0755318	0.0342972	LRP4	1
Spleen	BP	GO:0042633	hair cycle	1/6	114/18800	0.0358406	0.0755318	0.0342972	LRP4	1
Spleen	BP	GO:0015718	monocarboxylic acid transport	1/6	117/18800	0.0367691	0.0756655	0.0343579	NMB	1
Spleen	BP	GO:0035967	cellular response to topologically incorrect protein	1/6	117/18800	0.0367691	0.0756655	0.0343579	RNF5	1
Spleen	BP	GO:0030278	regulation of ossification	1/6	118/18800	0.0370784	0.0756655	0.0343579	LRP4	1
Spleen	BP	GO:0030326	embryonic limb morphogenesis	1/6	119/18800	0.0373877	0.0756655	0.0343579	LRP4	1
Spleen	BP	GO:0035113	embryonic appendage morphogenesis	1/6	119/18800	0.0373877	0.0756655	0.0343579	LRP4	1
Spleen	BP	GO:0046887	positive regulation of hormone secretion	1/6	122/18800	0.0383149	0.0769316	0.0349328	NMB	1
Spleen	BP	GO:0048706	embryonic skeletal system development	1/6	127/18800	0.0398587	0.0794061	0.0360564	MMP16	1
Spleen	BP	GO:0007093	mitotic cell cycle checkpoint signaling	1/6	130/18800	0.040784	0.0799782	0.0363162	XRCC3	1
Spleen	BP	GO:0042476	odontogenesis	1/6	130/18800	0.040784	0.0799782	0.0363162	LRP4	1
Spleen	BP	GO:0007098	centrosome cycle	1/6	131/18800	0.0410923	0.0799782	0.0363162	XRCC3	1
Spleen	BP	GO:0000723	telomere maintenance	1/6	132/18800	0.0414005	0.0799782	0.0363162	XRCC3	1
Spleen	BP	GO:0010977	negative regulation of neuron projection development	1/6	136/18800	0.0426324	0.081527	0.0370195	LRP4	1
Spleen	BP	GO:0048813	dendrite morphogenesis	1/6	139/18800	0.0435554	0.081527	0.0370195	LRP4	1
Spleen	BP	GO:0051783	regulation of nuclear division	1/6	139/18800	0.0435554	0.081527	0.0370195	XRCC3	1
Spleen	BP	GO:0050768	negative regulation of neurogenesis	1/6	140/18800	0.043863	0.081527	0.0370195	LRP4	1
Spleen	BP	GO:0035107	appendage morphogenesis	1/6	142/18800	0.0444778	0.081527	0.0370195	LRP4	1
Spleen	BP	GO:0035108	limb morphogenesis	1/6	142/18800	0.0444778	0.081527	0.0370195	LRP4	1
Spleen	BP	GO:0090090	negative regulation of canonical Wnt signaling pathway	1/6	142/18800	0.0444778	0.081527	0.0370195	LRP4	1
Spleen	BP	GO:1903531	negative regulation of secretion by cell	1/6	143/18800	0.044785	0.081527	0.0370195	NMB	1
Spleen	BP	GO:0031023	microtubule organizing center organization	1/6	145/18800	0.0453993	0.081527	0.0370195	XRCC3	1
Spleen	BP	GO:0051961	negative regulation of nervous system development	1/6	145/18800	0.0453993	0.081527	0.0370195	LRP4	1
Spleen	BP	GO:0016052	carbohydrate catabolic process	1/6	152/18800	0.0475468	0.0847863	0.0384994	NAGA	1
Spleen	BP	GO:0050770	regulation of axonogenesis	1/6	154/18800	0.0481596	0.0852827	0.0387248	LRP4	1
Spleen	BP	GO:0035966	response to topologically incorrect protein	1/6	160/18800	0.0499961	0.087072	0.0395373	RNF5	1
Spleen	BP	GO:0006665	sphingolipid metabolic process	1/6	161/18800	0.0503019	0.087072	0.0395373	NAGA	1
Spleen	BP	GO:0000724	double-strand break repair via homologous recombination	1/6	162/18800	0.0506076	0.087072	0.0395373	XRCC3	1
Spleen	BP	GO:0032200	telomere organization	1/6	162/18800	0.0506076	0.087072	0.0395373	XRCC3	1
Spleen	BP	GO:0099173	postsynapse organization	1/6	163/18800	0.0509133	0.087072	0.0395373	LRP4	1
Spleen	BP	GO:0000725	recombinational repair	1/6	164/18800	0.0512188	0.087072	0.0395373	XRCC3	1
Spleen	BP	GO:0051048	negative regulation of secretion	1/6	167/18800	0.052135	0.0880425	0.039978	NMB	1
Spleen	BP	GO:1901136	carbohydrate derivative catabolic process	1/6	169/18800	0.0527453	0.0882798	0.0400858	NAGA	1
Spleen	BP	GO:0000075	cell cycle checkpoint signaling	1/6	170/18800	0.0530504	0.0882798	0.0400858	XRCC3	1
Spleen	BP	GO:0000070	mitotic sister chromatid segregation	1/6	171/18800	0.0533554	0.0882798	0.0400858	XRCC3	1
Spleen	BP	GO:1905475	regulation of protein localization to membrane	1/6	172/18800	0.0536603	0.0882798	0.0400858	LRP4	1
Spleen	BP	GO:0030178	negative regulation of Wnt signaling pathway	1/6	174/18800	0.0542698	0.0887102	0.0402812	LRP4	1
Spleen	BP	GO:0048736	appendage development	1/6	177/18800	0.0551835	0.089062	0.0404409	LRP4	1
Spleen	BP	GO:0060173	limb development	1/6	177/18800	0.0551835	0.089062	0.0404409	LRP4	1
Spleen	BP	GO:0007416	synapse assembly	1/6	180/18800	0.0560965	0.0898885	0.0408162	LRP4	1
Spleen	BP	GO:0010721	negative regulation of cell development	1/6	181/18800	0.0564006	0.0898885	0.0408162	LRP4	1
Spleen	BP	GO:1901991	negative regulation of mitotic cell cycle phase transition	1/6	183/18800	0.0570087	0.0902933	0.041	XRCC3	1
Spleen	BP	GO:0007033	vacuole organization	1/6	188/18800	0.0585274	0.0915613	0.0415758	RNF5	1
Spleen	BP	GO:0031345	negative regulation of cell projection organization	1/6	188/18800	0.0585274	0.0915613	0.0415758	LRP4	1
Spleen	BP	GO:0050731	positive regulation of peptidyl-tyrosine phosphorylation	1/6	190/18800	0.0591344	0.0919467	0.0417508	LRP4	1
Spleen	BP	GO:1902115	regulation of organelle assembly	1/6	202/18800	0.0627691	0.0970068	0.0440485	RNF5	1
Spleen	BP	GO:0000819	sister chromatid segregation	1/6	205/18800	0.0636759	0.0978155	0.0444157	XRCC3	1
Spleen	BP	GO:0006643	membrane lipid metabolic process	1/6	207/18800	0.0642801	0.0981523	0.0445686	NAGA	1
Spleen	BP	GO:0050807	regulation of synapse organization	1/6	209/18800	0.0648839	0.0984846	0.0447195	LRP4	1
Spleen	BP	GO:0033044	regulation of chromosome organization	1/6	212/18800	0.0657891	0.0992676	0.0450751	XRCC3	1
Spleen	MF	GO:0015929	hexosaminidase activity	1/6	15/18410	0.00487936	0.0390848	0.0133106	NAGA	1
Spleen	MF	GO:0016894	endonuclease activity, active with either ribo- or deoxyribonucleic acids and producing 3'-phosphomonoesters	1/6	15/18410	0.00487936	0.0390848	0.0133106	XRCC3	1
Spleen	MF	GO:0000400	four-way junction DNA binding	1/6	17/18410	0.00552844	0.0390848	0.0133106	XRCC3	1
Spleen	MF	GO:0034185	apolipoprotein binding	1/6	18/18410	0.00585285	0.0390848	0.0133106	LRP4	1
Spleen	MF	GO:0070006	metalloaminopeptidase activity	1/6	27/18410	0.00876855	0.0390848	0.0133106	MMP16	1
Spleen	MF	GO:0005184	neuropeptide hormone activity	1/6	30/18410	0.00973887	0.0390848	0.0133106	NMB	1
Spleen	MF	GO:0000217	DNA secondary structure binding	1/6	36/18410	0.0116771	0.0390848	0.0133106	XRCC3	1
Spleen	MF	GO:0071855	neuropeptide receptor binding	1/6	36/18410	0.0116771	0.0390848	0.0133106	NMB	1
Spleen	MF	GO:0004520	endodeoxyribonuclease activity	1/6	37/18410	0.0119999	0.0390848	0.0133106	XRCC3	1
Spleen	MF	GO:0044390	ubiquitin-like protein conjugating enzyme binding	1/6	38/18410	0.0123225	0.0390848	0.0133106	RNF5	1
Spleen	MF	GO:0004177	aminopeptidase activity	1/6	39/18410	0.0126451	0.0390848	0.0133106	MMP16	1
Spleen	MF	GO:0004536	deoxyribonuclease activity	1/6	57/18410	0.0184361	0.0522357	0.0177893	XRCC3	1
Spleen	MF	GO:0097110	scaffold protein binding	1/6	67/18410	0.0216412	0.0555746	0.0189263	LRP4	1
Spleen	MF	GO:0008235	metalloexopeptidase activity	1/6	72/18410	0.0232404	0.0555746	0.0189263	MMP16	1
Spleen	MF	GO:0030971	receptor tyrosine kinase binding	1/6	76/18410	0.0245182	0.0555746	0.0189263	LRP4	1
Spleen	MF	GO:0004553	hydrolase activity, hydrolyzing O-glycosyl compounds	1/6	94/18410	0.0302512	0.0614221	0.0209177	NAGA	1
Spleen	MF	GO:0008238	exopeptidase activity	1/6	102/18410	0.0327901	0.0614221	0.0209177	MMP16	1
Spleen	MF	GO:0008094	ATP-dependent activity, acting on DNA	1/6	103/18410	0.0331071	0.0614221	0.0209177	XRCC3	1
Spleen	MF	GO:0004222	metalloendopeptidase activity	1/6	111/18410	0.0356398	0.0614221	0.0209177	MMP16	1
Spleen	MF	GO:1990782	protein tyrosine kinase binding	1/6	113/18410	0.0362721	0.0614221	0.0209177	LRP4	1
Spleen	MF	GO:0005179	hormone activity	1/6	122/18410	0.0391133	0.0614221	0.0209177	NMB	1
Spleen	MF	GO:0004519	endonuclease activity	1/6	124/18410	0.0397437	0.0614221	0.0209177	XRCC3	1
Spleen	MF	GO:0016798	hydrolase activity, acting on glycosyl bonds	1/6	144/18410	0.0460289	0.0680428	0.0231725	NAGA	1
Spleen	MF	GO:0008237	metallopeptidase activity	1/6	189/18410	0.0600455	0.0850644	0.0289693	MMP16	1
Spleen	MF	GO:0004518	nuclease activity	1/6	204/18410	0.0646793	0.0879639	0.0299567	XRCC3	1
Spleen	MF	GO:0140097	catalytic activity, acting on DNA	1/6	222/18410	0.0702148	0.0918194	0.0312698	XRCC3	1
Spleen	KEGG	hsa00603	Glycosphingolipid biosynthesis - globo and isoglobo series	1/5	15/8164	0.00915521	0.0640865	0.0481853	NAGA	1
Spleen	KEGG	hsa03440	Homologous recombination	1/5	41/8164	0.0248653	0.0870286	0.0654351	XRCC3	1
Heart	BP	GO:2000048	negative regulation of cell-cell adhesion mediated by cadherin	1/10	10/18800	0.0053077	0.0930632	0.0693265	NOTCH4	1
Heart	BP	GO:0001886	endothelial cell morphogenesis	1/10	11/18800	0.00583708	0.0930632	0.0693265	NOTCH4	1
Heart	BP	GO:0018026	peptidyl-lysine monomethylation	1/10	11/18800	0.00583708	0.0930632	0.0693265	SETD6	1
Heart	BP	GO:0045602	negative regulation of endothelial cell differentiation	1/10	12/18800	0.0063662	0.0930632	0.0693265	NOTCH4	1
Heart	BP	GO:0034982	mitochondrial protein processing	1/10	13/18800	0.00689506	0.0930632	0.0693265	IMMP2L	1
Heart	BP	GO:0015833	peptide transport	2/10	249/18800	0.00733022	0.0930632	0.0693265	SNX19/ABCB9	2
Heart	BP	GO:0035672	oligopeptide transmembrane transport	1/10	14/18800	0.00742367	0.0930632	0.0693265	ABCB9	1
Heart	BP	GO:0060354	negative regulation of cell adhesion molecule production	1/10	15/18800	0.00795203	0.0930632	0.0693265	NOTCH4	1
Heart	BP	GO:0006857	oligopeptide transport	1/10	16/18800	0.00848014	0.0930632	0.0693265	ABCB9	1
Heart	BP	GO:0019885	antigen processing and presentation of endogenous peptide antigen via MHC class I	1/10	17/18800	0.00900799	0.0930632	0.0693265	ABCB9	1
Heart	BP	GO:0060382	regulation of DNA strand elongation	1/10	17/18800	0.00900799	0.0930632	0.0693265	INO80E	1
Heart	BP	GO:1902018	negative regulation of cilium assembly	1/10	18/18800	0.00953559	0.0930632	0.0693265	MPHOSPH9	1
Heart	BP	GO:0042886	amide transport	2/10	287/18800	0.00963888	0.0930632	0.0693265	SNX19/ABCB9	2
Heart	BP	GO:0002483	antigen processing and presentation of endogenous peptide antigen	1/10	19/18800	0.0100629	0.0930632	0.0693265	ABCB9	1
Heart	BP	GO:2000047	regulation of cell-cell adhesion mediated by cadherin	1/10	21/18800	0.0111169	0.0930632	0.0693265	NOTCH4	1
Heart	BP	GO:0030728	ovulation	1/10	23/18800	0.0121698	0.0930632	0.0693265	IMMP2L	1
Heart	BP	GO:0060353	regulation of cell adhesion molecule production	1/10	23/18800	0.0121698	0.0930632	0.0693265	NOTCH4	1
Heart	BP	GO:0019883	antigen processing and presentation of endogenous antigen	1/10	26/18800	0.0137473	0.0940605	0.0700694	ABCB9	1
Heart	BP	GO:0060352	cell adhesion molecule production	1/10	26/18800	0.0137473	0.0940605	0.0700694	NOTCH4	1
Heart	BP	GO:0044331	cell-cell adhesion mediated by cadherin	1/10	28/18800	0.0147977	0.0948538	0.0706603	NOTCH4	1
Heart	BP	GO:0002474	antigen processing and presentation of peptide antigen via MHC class I	1/10	29/18800	0.0153225	0.0948538	0.0706603	ABCB9	1
Heart	MF	GO:0035673	oligopeptide transmembrane transporter activity	1/10	11/18410	0.00596043	0.0573757	0.0319741	ABCB9	1
Heart	MF	GO:0008253	5'-nucleotidase activity	1/10	13/18410	0.0070407	0.0573757	0.0319741	NT5DC2	1
Heart	MF	GO:0008252	nucleotidase activity	1/10	15/18410	0.00811991	0.0573757	0.0319741	NT5DC2	1
Heart	MF	GO:1904680	peptide transmembrane transporter activity	1/10	15/18410	0.00811991	0.0573757	0.0319741	ABCB9	1
Heart	MF	GO:1904047	S-adenosyl-L-methionine binding	1/10	18/18410	0.00973676	0.0573757	0.0319741	SETD6	1
Heart	MF	GO:0042288	MHC class I protein binding	1/10	22/18410	0.0118889	0.0573757	0.0319741	ABCB9	1
Heart	MF	GO:0005540	hyaluronic acid binding	1/10	24/18410	0.0129633	0.0573757	0.0319741	HAPLN4	1
Heart	MF	GO:0005112	Notch binding	1/10	25/18410	0.0135002	0.0573757	0.0319741	NOTCH4	1
Heart	MF	GO:0051059	NF-kappaB binding	1/10	31/18410	0.0167157	0.0631482	0.035191	SETD6	1
Heart	MF	GO:0042887	amide transmembrane transporter activity	1/10	35/18410	0.0188542	0.0641041	0.0357237	ABCB9	1
Heart	MF	GO:0042287	MHC protein binding	1/10	42/18410	0.0225864	0.0698124	0.0389047	ABCB9	1
Heart	MF	GO:0140359	ABC-type transporter activity	1/10	49/18410	0.0263058	0.0745331	0.0415355	ABCB9	1
Heart	MF	GO:0016279	protein-lysine N-methyltransferase activity	1/10	58/18410	0.0310692	0.076736	0.0427631	SETD6	1
Heart	MF	GO:0016278	lysine N-methyltransferase activity	1/10	59/18410	0.0315972	0.076736	0.0427631	SETD6	1
Heart	KEGG	hsa03060	Protein export	1/3	23/8164	0.00842898	0.0645806	0.0226599	IMMP2L	1
Heart	KEGG	hsa02010	ABC transporters	1/3	45/8164	0.016447	0.0645806	0.0226599	ABCB9	1
Heart	KEGG	hsa04330	Notch signaling pathway	1/3	59/8164	0.0215269	0.0645806	0.0226599	NOTCH4	1
Heart	KEGG	hsa01522	Endocrine resistance	1/3	98/8164	0.0355855	0.0682164	0.0239356	NOTCH4	1
Heart	KEGG	hsa04919	Thyroid hormone signaling pathway	1/3	121/8164	0.043813	0.0682164	0.0239356	NOTCH4	1
Heart	KEGG	hsa04142	Lysosome	1/3	132/8164	0.0477313	0.0682164	0.0239356	ABCB9	1
Heart	KEGG	hsa05224	Breast cancer	1/3	147/8164	0.0530572	0.0682164	0.0239356	NOTCH4	1
Muscle	CC	GO:0031089	platelet dense granule lumen	2/30	14/19594	0.000203878	0.0092833	0.00705061	ITIH3/ITIH4	2
Muscle	CC	GO:0031011	Ino80 complex	2/30	15/19594	0.00023502	0.0092833	0.00705061	INO80E/ACTR5	2
Muscle	CC	GO:0042827	platelet dense granule	2/30	21/19594	0.000467363	0.0123072	0.00934727	ITIH3/ITIH4	2
Muscle	CC	GO:0097346	INO80-type complex	2/30	26/19594	0.000719867	0.0142174	0.010798	INO80E/ACTR5	2
Muscle	MF	GO:0004866	endopeptidase inhibitor activity	3/26	180/18410	0.00202528	0.0517836	0.0334088	ITIH3/C4B/ITIH4	3
Muscle	MF	GO:0030414	peptidase inhibitor activity	3/26	187/18410	0.0022575	0.0517836	0.0334088	ITIH3/C4B/ITIH4	3
Muscle	MF	GO:0061135	endopeptidase regulator activity	3/26	194/18410	0.00250566	0.0517836	0.0334088	ITIH3/C4B/ITIH4	3
Muscle	MF	GO:0061134	peptidase regulator activity	3/26	230/18410	0.00404731	0.0627334	0.0404731	ITIH3/C4B/ITIH4	3
Liver	BP	GO:0035672	oligopeptide transmembrane transport	1/5	14/18800	0.00371826	0.0292524	0.0148651	ABCB9	1
Liver	BP	GO:0006857	oligopeptide transport	1/5	16/18800	0.00424853	0.0292524	0.0148651	ABCB9	1
Liver	BP	GO:0019885	antigen processing and presentation of endogenous peptide antigen via MHC class I	1/5	17/18800	0.00451359	0.0292524	0.0148651	ABCB9	1
Liver	BP	GO:0060382	regulation of DNA strand elongation	1/5	17/18800	0.00451359	0.0292524	0.0148651	INO80E	1
Liver	BP	GO:0002483	antigen processing and presentation of endogenous peptide antigen	1/5	19/18800	0.00504352	0.0292524	0.0148651	ABCB9	1
Liver	BP	GO:0019883	antigen processing and presentation of endogenous antigen	1/5	26/18800	0.00689653	0.0318578	0.0161891	ABCB9	1
Liver	BP	GO:0002474	antigen processing and presentation of peptide antigen via MHC class I	1/5	29/18800	0.00768982	0.0318578	0.0161891	ABCB9	1
Liver	BP	GO:0022616	DNA strand elongation	1/5	37/18800	0.00980281	0.0355352	0.0180578	INO80E	1
Liver	BP	GO:0030199	collagen fibril organization	1/5	62/18800	0.0163827	0.0452662	0.0230028	TNXA	1
Liver	BP	GO:0048002	antigen processing and presentation of peptide antigen	1/5	63/18800	0.0166452	0.0452662	0.0230028	ABCB9	1
Liver	BP	GO:0035914	skeletal muscle cell differentiation	1/5	65/18800	0.0171699	0.0452662	0.0230028	FOXN2	1
Liver	BP	GO:0019882	antigen processing and presentation	1/5	107/18800	0.0281383	0.0680009	0.0345558	ABCB9	1
Liver	BP	GO:0006275	regulation of DNA replication	1/5	131/18800	0.0343619	0.0766534	0.0389527	INO80E	1
Liver	BP	GO:0007519	skeletal muscle tissue development	1/5	155/18800	0.0405535	0.0840036	0.0426879	FOXN2	1
Liver	BP	GO:0060538	skeletal muscle organ development	1/5	167/18800	0.0436374	0.0843656	0.0428718	FOXN2	1
Liver	BP	GO:0033044	regulation of chromosome organization	1/5	212/18800	0.0551314	0.0956307	0.0485964	INO80E	1
Liver	BP	GO:0007160	cell-matrix adhesion	1/5	235/18800	0.0609632	0.0956307	0.0485964	STRCP1	1
Liver	BP	GO:0015833	peptide transport	1/5	249/18800	0.0644989	0.0956307	0.0485964	ABCB9	1
Liver	BP	GO:0006338	chromatin remodeling	1/5	266/18800	0.068778	0.0956307	0.0485964	INO80E	1
Liver	BP	GO:0006260	DNA replication	1/5	280/18800	0.0722901	0.0956307	0.0485964	INO80E	1
Liver	BP	GO:0042886	amide transport	1/5	287/18800	0.0740422	0.0956307	0.0485964	ABCB9	1
Liver	BP	GO:0030198	extracellular matrix organization	1/5	307/18800	0.0790336	0.0956307	0.0485964	TNXA	1
Liver	BP	GO:0043062	extracellular structure organization	1/5	308/18800	0.0792826	0.0956307	0.0485964	TNXA	1
Liver	BP	GO:0045229	external encapsulating structure organization	1/5	310/18800	0.0797805	0.0956307	0.0485964	TNXA	1
Liver	BP	GO:0006310	DNA recombination	1/5	324/18800	0.0832594	0.0956307	0.0485964	INO80E	1
Liver	BP	GO:0007517	muscle organ development	1/5	334/18800	0.0857379	0.0956307	0.0485964	FOXN2	1
Liver	CC	GO:0060091	kinocilium	1/6	11/19594	0.00336408	0.0336237	0.0144791	STRCP1	1
Liver	CC	GO:0097732	9+2 non-motile cilium	1/6	11/19594	0.00336408	0.0336237	0.0144791	STRCP1	1
Liver	CC	GO:0031011	Ino80 complex	1/6	15/19594	0.00458504	0.0336237	0.0144791	INO80E	1
Liver	CC	GO:0032426	stereocilium tip	1/6	21/19594	0.00641415	0.0349196	0.0150371	STRCP1	1
Liver	CC	GO:0097346	INO80-type complex	1/6	26/19594	0.00793627	0.0349196	0.0150371	INO80E	1
Liver	CC	GO:0032420	stereocilium	1/6	54/19594	0.0164242	0.0592059	0.0254954	STRCP1	1
Liver	CC	GO:0032421	stereocilium bundle	1/6	62/19594	0.0188382	0.0592059	0.0254954	STRCP1	1
Liver	CC	GO:0070603	SWI/SNF superfamily-type complex	1/6	86/19594	0.0260506	0.0651435	0.0280522	INO80E	1
Liver	CC	GO:1904949	ATPase complex	1/6	88/19594	0.0266496	0.0651435	0.0280522	INO80E	1
Liver	CC	GO:0140534	endoplasmic reticulum protein-containing complex	1/6	125/19594	0.0376765	0.0809807	0.0348721	ABCB9	1
Liver	CC	GO:0098862	cluster of actin-based cell projections	1/6	158/19594	0.0474232	0.0809807	0.0348721	STRCP1	1
Liver	CC	GO:0030176	integral component of endoplasmic reticulum membrane	1/6	164/19594	0.0491864	0.0809807	0.0348721	ABCB9	1
Liver	CC	GO:0097730	non-motile cilium	1/6	166/19594	0.0497736	0.0809807	0.0348721	STRCP1	1
Liver	CC	GO:0031227	intrinsic component of endoplasmic reticulum membrane	1/6	172/19594	0.0515332	0.0809807	0.0348721	ABCB9	1
Liver	CC	GO:0098858	actin-based cell projection	1/6	217/19594	0.0646441	0.0932606	0.0401601	STRCP1	1
Liver	CC	GO:0000228	nuclear chromosome	1/6	228/19594	0.0678259	0.0932606	0.0401601	INO80E	1
Liver	MF	GO:0035673	oligopeptide transmembrane transporter activity	1/5	11/18410	0.00298426	0.0178842	0.00209172	ABCB9	1
Liver	MF	GO:1904680	peptide transmembrane transporter activity	1/5	15/18410	0.00406768	0.0178842	0.00209172	ABCB9	1
Liver	MF	GO:0042288	MHC class I protein binding	1/5	22/18410	0.0059614	0.0178842	0.00209172	ABCB9	1
Liver	MF	GO:0042887	amide transmembrane transporter activity	1/5	35/18410	0.00947065	0.0198581	0.00232259	ABCB9	1
Liver	MF	GO:0042287	MHC protein binding	1/5	42/18410	0.0113561	0.0198581	0.00232259	ABCB9	1
Liver	MF	GO:0140359	ABC-type transporter activity	1/5	49/18410	0.0132388	0.0198581	0.00232259	ABCB9	1
Liver	MF	GO:0042626	ATPase-coupled transmembrane transporter activity	1/5	90/18410	0.024208	0.0311246	0.0036403	ABCB9	1
Liver	MF	GO:0015399	primary active transmembrane transporter activity	1/5	162/18410	0.0432349	0.0486393	0.0056888	ABCB9	1
Liver	KEGG	hsa02010	ABC transporters	1/1	45/8164	0.005512	0.011024		ABCB9	1
Liver	KEGG	hsa04142	Lysosome	1/1	132/8164	0.0161685	0.0161685		ABCB9	1
Adipose	CC	GO:0097730	non-motile cilium	3/24	166/19594	0.00106041	0.0710474	0.0580434	STRCP1/SDCCAG8/ARL3	3
Adipose	KEGG	hsa04927	Cortisol synthesis and secretion	2/9	65/8164	0.00216763	0.0975434	0.0844235	CREB3L4/CYP21A2	2
